# Supplementary material for: Targeting insulin signaling and TRAF2/JNK pathway: a comprehensive in silico study of Uncaria tomentosa compounds
Source: Research Square preprint supplement (doi:10.21203/rs.3.rs-7962616/v1), 2025-11-17
Supplement: Supplementary file 1 [file 2289424b4f0139f3f27dc3c6.pdf]

**Targeting insulin signaling and TRAF2/JNK pathway: a comprehensive *in silico* study of *Uncaria tomentosa* compounds**

Bruna Leticia de Freitas-Marchi <sup>1 \*</sup>, Shraddha Parate <sup>2</sup>, Vibhu Jha <sup>3</sup>, Felipe Santiago Chambergo Alcalde <sup>4</sup>, Leif A. Eriksson <sup>1</sup>, Viviane Abreu Nunes <sup>4 \*</sup>

<sup>1</sup> Department of Chemistry and Molecular Biology, University of Gothenburg (GU), Göteborg, Sweden;

<sup>2</sup> Department of Life Sciences, Chalmers University of Technology, Göteborg, Sweden;

<sup>3</sup> Institute of Cancer Therapeutics, School of Pharmacy and Medical Sciences, University of Bradford, United Kingdom;

<sup>4</sup> Laboratory of Skin Physiology and Tissue Bioengineering, School of Arts, Sciences and Humanities, University of Sao Paulo (EACH-USP), São Paulo, SP, Brazil

\* Corresponding authors:

Viviane Abreu Nunes / Bruna Leticia de Freitas-Marchi

Email: vanunes@ib.usp.br / bruna.marchi@gu.se

**SUPPLEMENTARY MATERIAL**

**5-carboxystrictosidine**

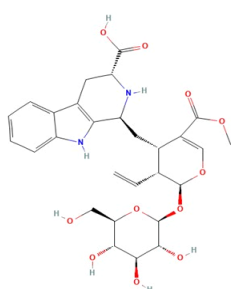

**7-deoxyloganic acid**

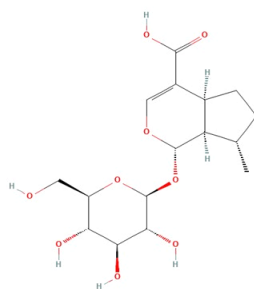

**Cinchonain**

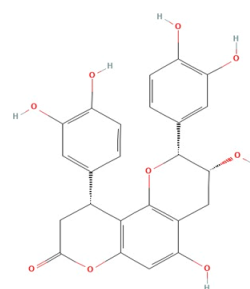

**Epicatechin**

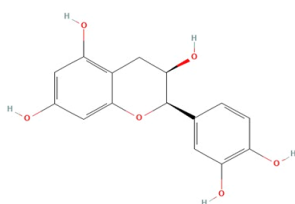

**Hirsuteine**

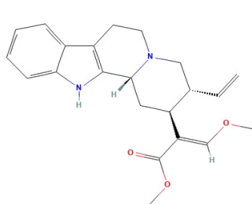

**Hirsutine**

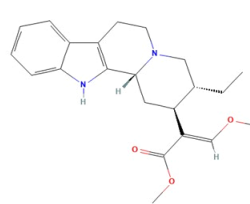

**Isomitraphylline**

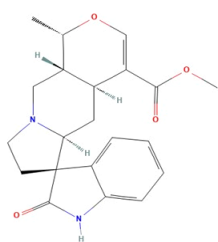

**Isorhynchophylline**

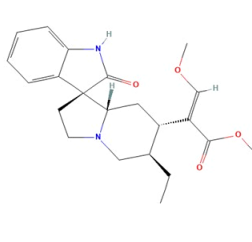

**Mitraphylline**

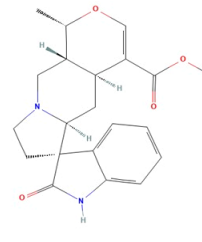

**Rhynchophylline**

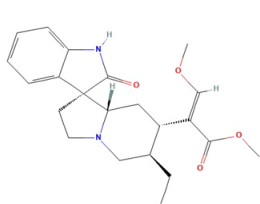

**Strictosamide**

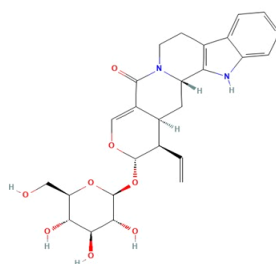

**Uncarine C  
(Pteropodine)**

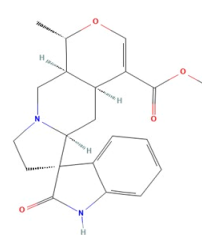

**Uncarine D  
(Speciophylline)**

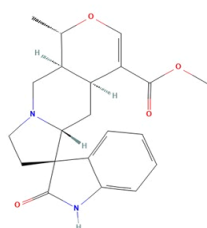

**Uncarine E  
(Isopteropodine)**

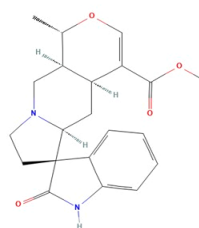

**Figure S1. Chemical structures of the 14 compounds found in UT, obtained from the PubChem database**

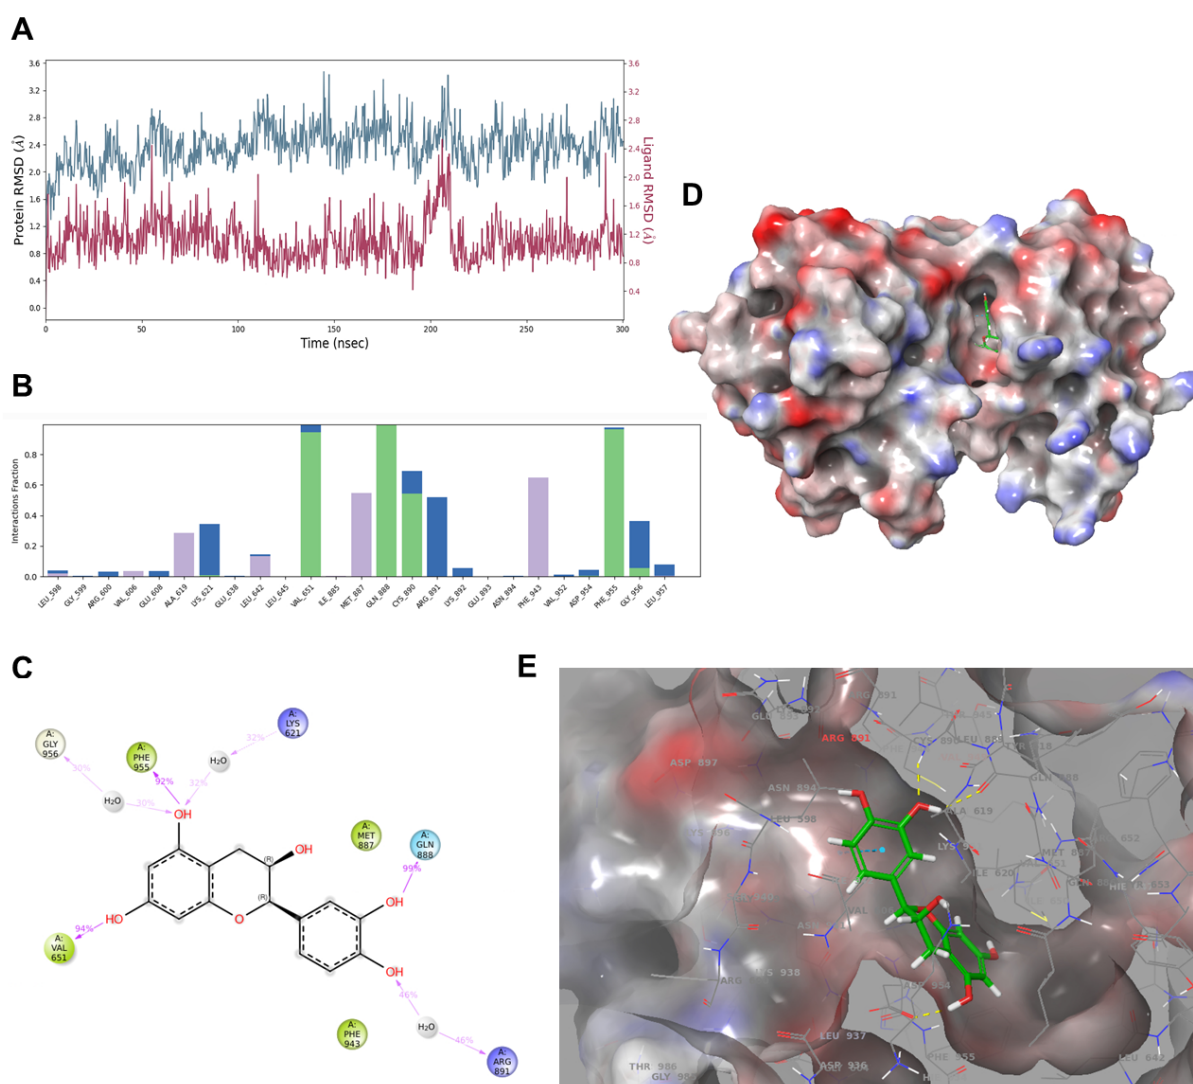

**Figure S2. Molecular dynamics between PERK protein and the compound Epicatechin. A)** RMSD values for the protein-ligand complex (compound); **B and C)** Occurrence of hydrophilic or hydrophobic interactions, with certain residues, during the dynamics simulation; **D and E)** Three-dimensional demonstration of the interactions between the compound and the protein binding site





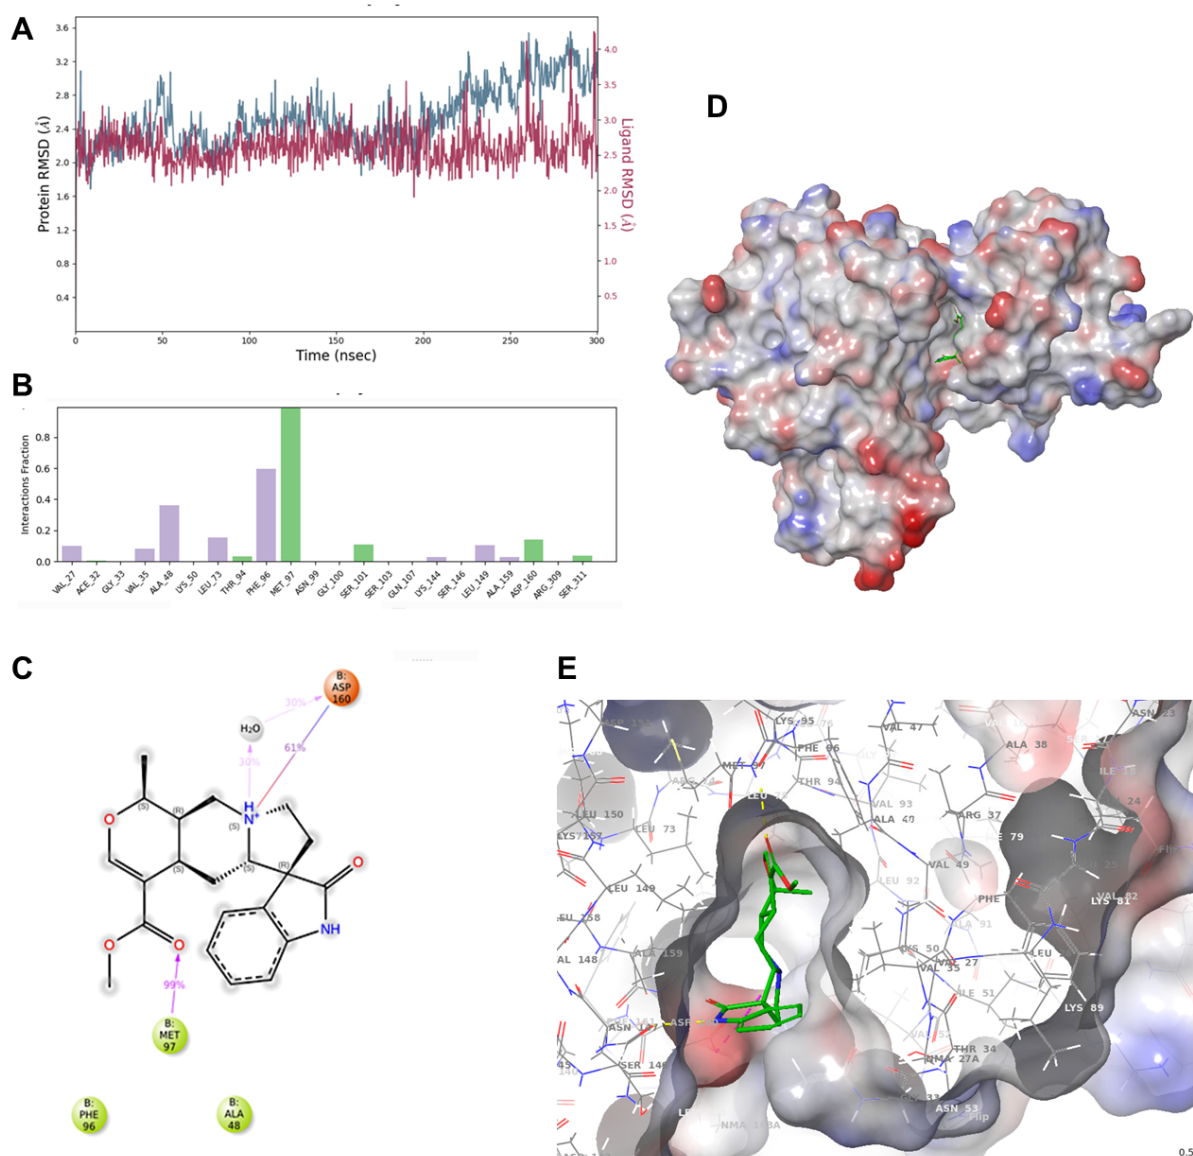

**Figure S4. Molecular dynamics between TRAF2 protein and the compound Mitraphylline. A)** RMSD values for the protein-ligand complex (compound); **B and C)** Occurrence of hydrophilic or hydrophobic interactions, with certain residues, during the dynamics simulation; **D and E)** Three-dimensional demonstration of the interactions between the compound and the protein binding site





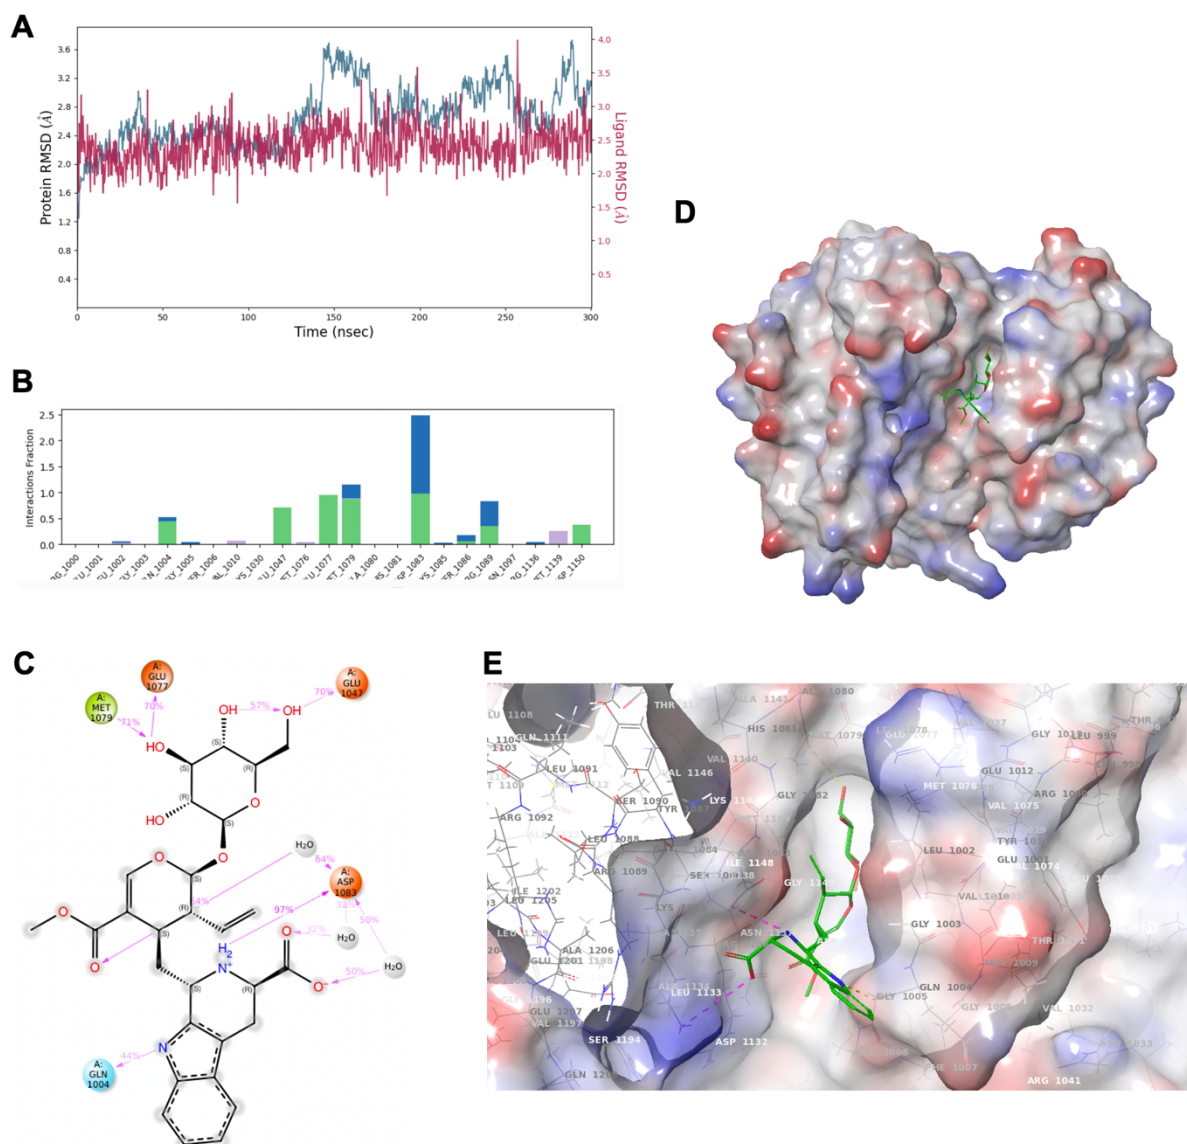

**Figure S7. Molecular dynamics between IRS-1 protein and the compound 5-Carboxystrictosidine. A)** RMSD values for the protein-ligand complex (compound); **B and C)** Occurrence of hydrophilic or hydrophobic interactions, with certain residues, during the dynamics simulation; **D and E)** Three-dimensional demonstration of the interactions between the compound and the protein binding site



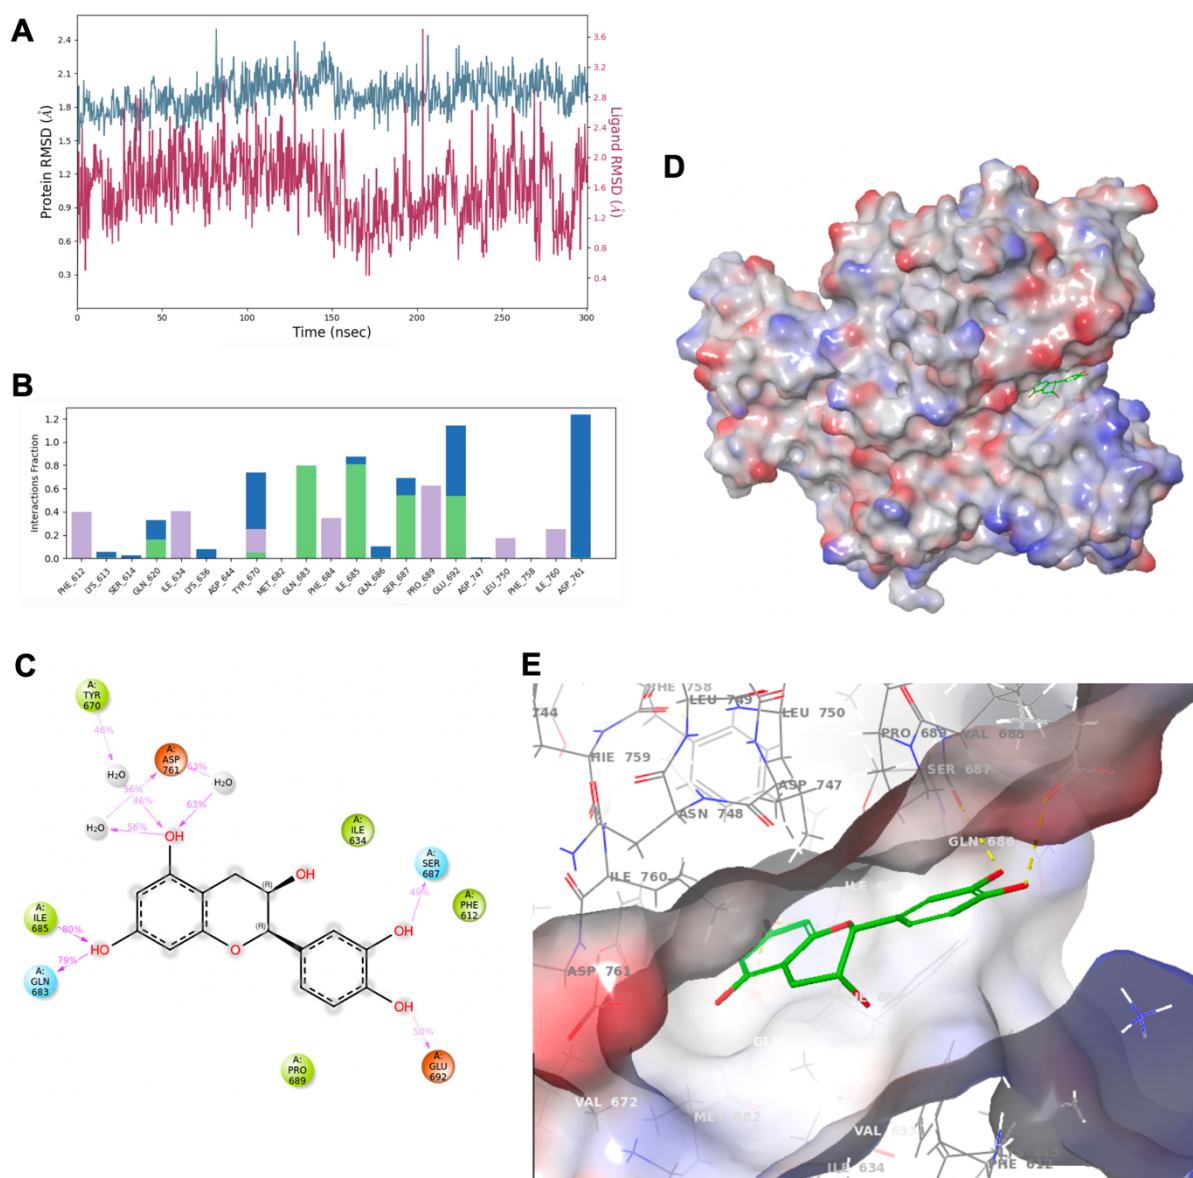

**Figure S8. Molecular dynamics between PI3K protein and the compound Epicatechin. A)** RMSD values for the protein-ligand complex (compound); **B and C)** Occurrence of hydrophilic or hydrophobic interactions, with certain residues, during the dynamics simulation; **D and E)** Three-dimensional demonstration of the interactions between the compound and the protein binding site

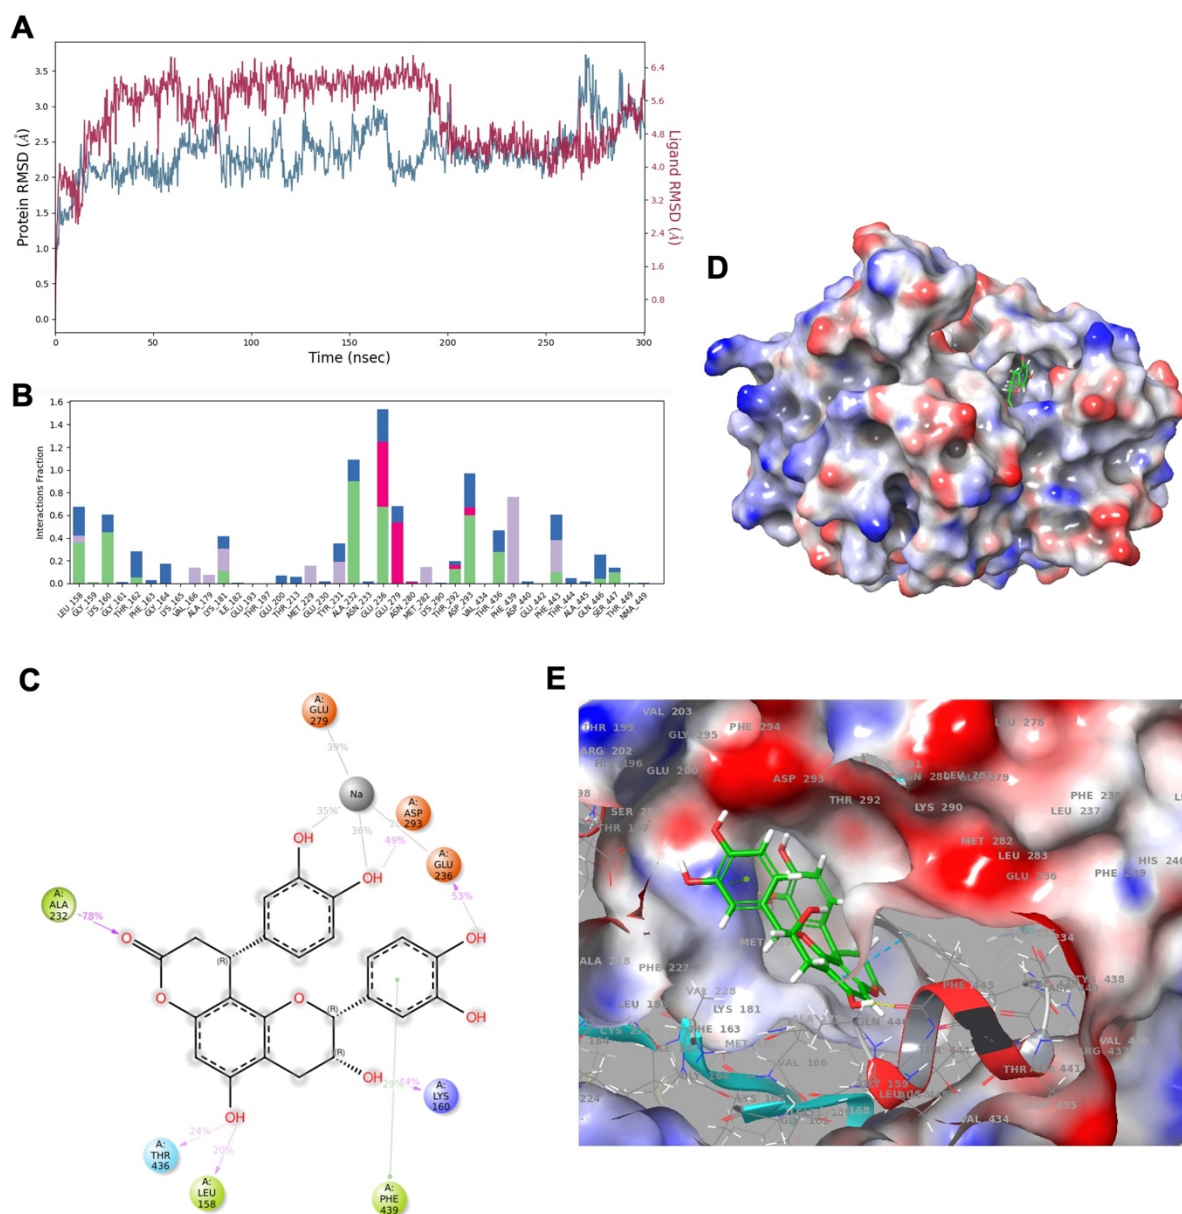

**Figure S9. Molecular dynamics between AKT protein and the compound Cinchonain. A)** RMSD values for the protein-ligand complex (compound); **B and C)** Occurrence of hydrophilic or hydrophobic interactions, with certain residues, during the dynamics simulation; **D and E)** Three-dimensional demonstration of the interactions between the compound and the protein binding site

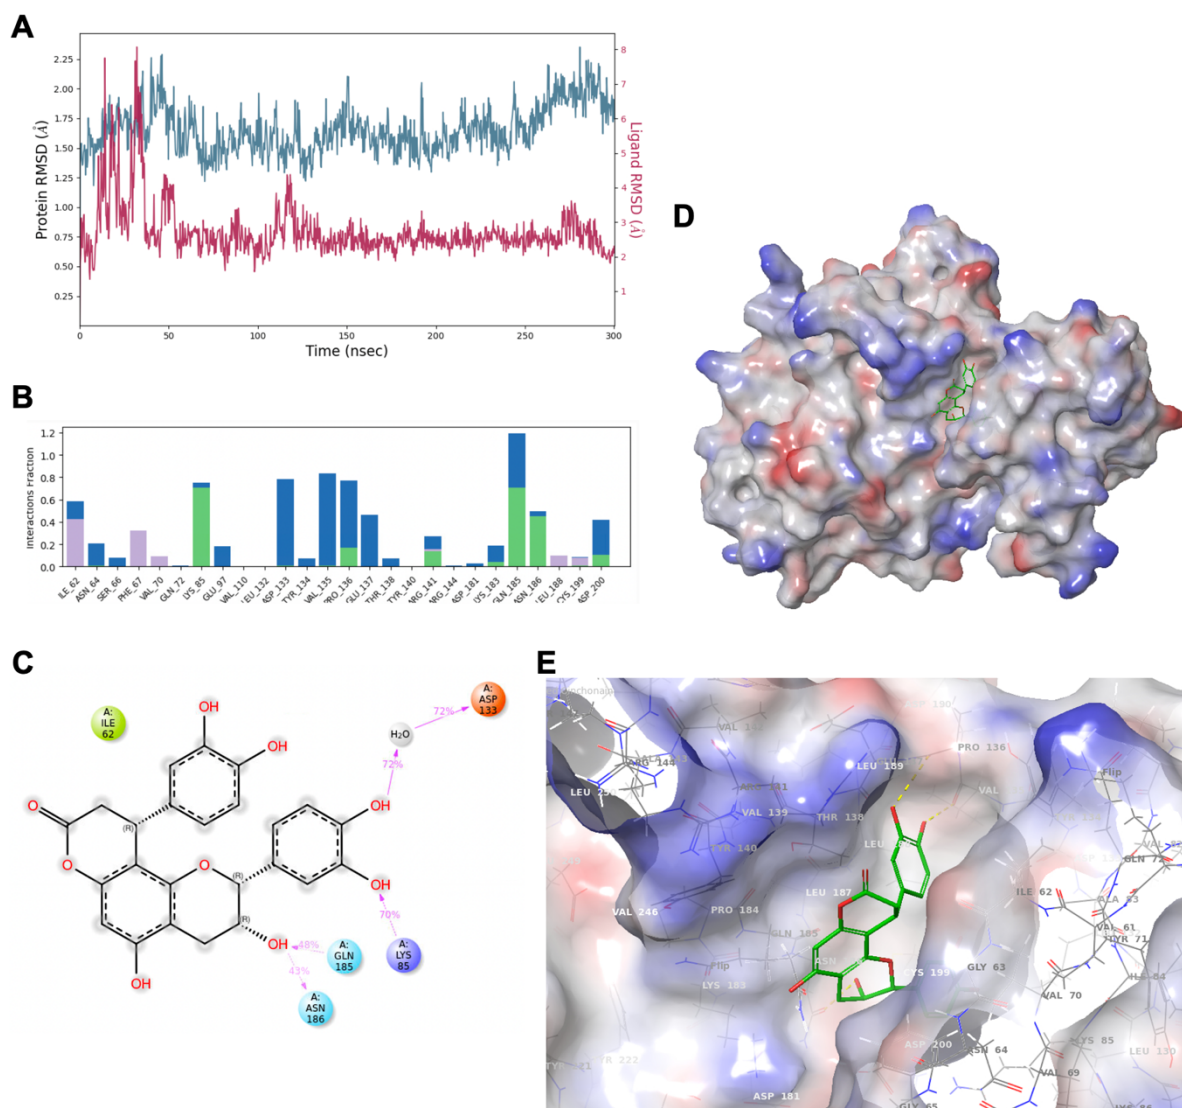

**Figure S10. Molecular dynamics between GSK3 $\beta$  protein and the compound Cinchonain. A)** RMSD values for the protein-ligand complex (compound); **B and C)** Occurrence of hydrophilic or hydrophobic interactions, with certain residues, during the dynamics simulation; **D and E)** Three-dimensional demonstration of the interactions between the compound and the protein binding site
